# Supplementary material for: Exploring Potentilla nepalensis Phytoconstituents: Integrated Strategies of Network Pharmacology, Molecular Docking, Dynamic Simulations, and MMGBSA Analysis for Cancer Therapeutic Targets Discovery
Source: Pharmaceuticals (Basel). 2024 Jan 19;17(1):134. doi: 10.3390/ph17010134 (PMC10819299; doi:10.3390/ph17010134)
Supplement: Supplementary file 1 [file pharmaceuticals-17-00134-s001.zip › Excel S1. Enrichment analysis.xlsx]

## Sheet: MR
Biological process
Term		Genes
Positive Regulation Of Nucleic Acid-Templated Transcription (GO:1903508)	13	KCNH2;NEK4;NME2;MITF;ETS1;FOXO1;HOXA11;LRP6;WNT11;KAT5;ZIC2;WT1;ZNF711
Ureteric Bud Morphogenesis (GO:0060675)	3	WNT11;WT1;HOXA11
Renal Filtration Cell Differentiation (GO:0061318)	2	WT1;PTPRO
Glomerular Epithelial Cell Differentiation (GO:0072311)	2	WT1;PTPRO
Negative Regulation Of Multicellular Organismal Process (GO:0051241)	7	GJA1;BRMS1;WNT11;RPS19;TNNT1;PTPRO;VASN
Cellular Response To Oxidative Stress (GO:0034599)	5	MAPK8;ERMP1;TPM1;ARNT;FOXO1
Actomyosin Structure Organization (GO:0031032)	4	FAM171A1;TNNT1;TPM1;ZYX
Adrenal Gland Development (GO:0030325)	2	WNT11;WT1
Podocyte Differentiation (GO:0072112)	2	WT1;PTPRO
Cellular Response To Chemical Stress (GO:0062197)	4	MAPK8;ERMP1;TRIM21;FOXO1
Molecular functions
Term		Genes
Protein Homodimerization Activity (GO:0042803)	11	KCNH2;TPI1;FECH;GCA;TPM1;PSAP;PTPRO;ARNT;TRIM21;ELAVL1;LRP6
Phosphoric Ester Hydrolase Activity (GO:0042578)	3	PPP1CB;PTPRO;PPP1CA
Protein Serine/Threonine Phosphatase Activity (GO:0004722)	3	PPP1CB;CTDSPL;PPP1CA
Phosphatase Activator Activity (GO:0019211)	2	KAT5;CALM1
Ubiquitin Protein Ligase Binding (GO:0031625)	6	KCNH2;TPI1;POLR2A;HSPA1L;TRAF5;FOXO1
mRNA 3'-UTR AU-rich Region Binding (GO:0035925)	2	EXOSC4;ELAVL1
Ubiquitin-Like Protein Ligase Binding (GO:0044389)	6	KCNH2;TPI1;POLR2A;HSPA1L;TRAF5;FOXO1
Ferrous Iron Binding (GO:0008198)	2	FECH;FTL
Inward Rectifier Potassium Channel Activity (GO:0005242)	2	KCNH2;KCNJ10
Ligand-Gated Monoatomic Cation Channel Activity (GO:0099094)	3	KCNH2;KCNJ10;CHRNE
Cellular components
Term		Genes
Vacuolar Lumen (GO:0005775)	5	GCA;CREG1;PSAP;CTSD;FTL
Secretory Granule Lumen (GO:0034774)	7	SERPINB1;GCA;CREG1;NME2;ALDOA;CTSD;FTL
Azurophil Granule (GO:0042582)	4	GCA;CREG1;PSAP;FTL
Azurophil Granule Lumen (GO:0035578)	3	GCA;CREG1;FTL
Intracellular Membrane-Bounded Organelle (GO:0043231)	42	ETS1;ELAVL1;TOB1;FOXO1;HOXA11;PPP1CB;GJA1;MAPK8;EXOSC4;KAT5;ZIC2;POLR2A;LAMP3;PSAP;TRA2A;TRIM21;TNPO2;HTATIP2;CADPS2;TPI1;KHNYN;MSX2;HSPA1L;SPAG6;CBX2;NME2;ARNT;MITF;NAP1L1;PGD;PPP1CA;POR;BRMS1;WT1;MSH5;ITPKA;REL;ZYX;ZNF711;MT1H;CALM1;ALDOA
Ficolin-1-Rich Granule (GO:0101002)	4	STBD1;NME2;ALDOA;CTSD
Nucleus (GO:0005634)	37	ETS1;ELAVL1;TOB1;FOXO1;HOXA11;PPP1CB;MAPK8;EXOSC4;KAT5;ZIC2;POLR2A;TRA2A;TRIM21;TNPO2;HTATIP2;TPI1;KHNYN;MSX2;HSPA1L;SPAG6;CBX2;NME2;ARNT;MITF;NAP1L1;PGD;PPP1CA;BRMS1;WT1;MSH5;ITPKA;REL;ZYX;ZNF711;MT1H;CALM1;ALDOA
Alveolar Lamellar Body (GO:0097208)	1	LAMP3
Box C/D RNP Complex (GO:0031428)	1	NOP56
Cytoplasmic Vesicle Lumen (GO:0060205)	3	SERPINB1;NME2;ALDOA
Pathways
Term		Genes
Leptin signaling pathway	4	MAPK8;CISH;REL;FOXO1
Wnt signaling in kidney disease	3	MAPK8;WNT11;LRP6
VEGFA-VEGFR2 Signaling Pathway	9	GJA1;MAPK8;ARNT;NAP1L1;PGD;ALDOA;ETS1;FOXO1;PPP1CA
MicroRNAs in cardiomyocyte hypertrophy	4	MAPK8;CISH;CALM1;LRP6
Common Pathways Underlying Drug Addiction	3	PPP1CB;CALM1;PPP1CA
Computational Model of Aerobic Glycolysis	2	TPI1;ALDOA
Nanoparticle triggered regulated necrosis	2	MAPK8;FTL
Development of ureteric collection system	3	WNT11;WT1;HOXA11
Endoplasmic reticulum stress response in coronavirus infection	3	PPP1CB;MAPK8;PPP1CA
B Cell Receptor Signaling Pathway	4	MAPK8;REL;ETS1;FOXO1
Diseases
Term		Genes
Mammary Neoplasms	34	PTPRO;ETS1;ELAVL1;TOB1;FOXO1;LRP6;GJA1;MAPK8;WNT11;KAT5;LAMP3;PSAP;CTSD;GALNT6;SERPINB1;IL4R;TPI1;CISH;MSX2;TPM1;NME2;ARNT;TBC1D9;PDZK1;PPP1CA;POR;BRMS1;AKR1B10;IFI27;THEMIS2;WT1;REL;MT1H;ALDOA
melanoma	34	PTPRO;PLA2G6;ETS1;ELAVL1;FOXO1;HOXA11;IFIH1;GJA1;MAPK8;KAT5;OS9;LAMP3;CTSD;HTATIP2;KCNH2;STARD13;SERPINB1;TPI1;CISH;MSX2;TREX1;TPM1;NME2;ARNT;TBC1D9;MITF;BRMS1;AKR1B10;IFI27;WT1;ZYX;CALM1;SLC25A4;FTL
Rheumatoid Arthritis	28	LST1;ETS1;ELAVL1;FOXO1;LRP6;IFIH1;MAPK8;RPS19;KAT5;OS9;LAMP3;TRIM21;CTSD;IL4R;TPI1;CISH;HSPA1L;IL10RB;TREX1;TBC1D9;MITF;AKR1B10;IFI27;MSH5;TRAF5;REL;CALM1;FTL
Tumor Progression	30	ETS1;ELAVL1;TOB1;LRP6;GJA1;MAPK8;RPS19;KAT5;LAMP3;PSAP;TRA2A;CKB;CTSD;HTATIP2;KCNH2;IL4R;TPI1;CISH;HSPA1L;CTDSPL;ARNT;TBC1D9;MITF;NAP1L1;BRMS1;AKR1B10;IFI27;WT1;REL;CALM1
Neoplasm Metastasis	45	PLA2G6;ETS1;ELAVL1;TOB1;PCDH17;FOXO1;LRP6;GJA1;RPPH1;MAPK8;WNT11;KAT5;ZIC2;LAMP3;PSAP;CKB;CTSD;HTATIP2;KCNH2;STARD13;IL4R;TPI1;CISH;TREX1;CBX2;TPM1;NME2;ARNT;TBC1D9;MITF;NAP1L1;PDZK1;PPP1CA;BRMS1;AKR1B10;IFI27;TNNT1;TMSB15A;WT1;ZYX;MT1H;CALM1;ALDOA;FTL
Squamous cell carcinoma	28	ETS1;ELAVL1;HOXA11;LRP6;GJA1;MAPK8;WNT11;ZIC2;HEATR3;TRIM21;CTSD;HTATIP2;KCNH2;TPI1;CISH;CTDSPL;NME2;TBC1D9;PPP1CA;POR;BRMS1;AKR1B10;IFI27;WT1;ITPKA;ZYX;CALM1
Liver carcinoma	41	PTPRO;PLA2G6;ETS1;PCDH17;FOXO1;LRP6;IFIH1;GJA1;MAPK8;WNT11;RPS19;KAT5;ZIC2;TRIM21;CTSD;HTATIP2;STARD13;IL4R;TPI1;CISH;HSPA1L;IL10RB;NME2;ARNT;TBC1D9;MITF;PDZK1;PGD;PTGR1;VASN;PPP1CA;BRMS1;AKR1B10;IFI27;WT1;REL;ZYX;MT1H;CALM1;FTL
Uveitis	6	KCNJ10;CISH;HSPA1L;TRAF5;CKB;ETS1
Malignant neoplasm of stomach	30	ETS1;TOB1;FOXO1;HOXA11;LRP6;GJA1;RPPH1;MAPK8;RPS19;POLR2A;LAMP3;CKB;CTSD;KCNH2;NOP56;STARD13;IL4R;TPI1;CISH;MSX2;ARNT;TBC1D9;PGD;PPP1CA;AKR1B10;IFI27;WT1;CALM1;ALDOA
Leukodystrophy	7	IFIH1;GJA1;TREX1;PSAP;ABAT;PLA2G6;SLC25A4
Drugs
Term		Genes
Aprindine	2	KCNH2;CALM1
Domperidone	2	KCNH2;CALM1
Trifluoperazine	2	KCNH2;CALM1
Cyproheptadine	2	KCNH2;CALM1
Pimozide	2	KCNH2;CALM1
Pitolisant	1	KCNH2
Brompheniramine	1	KCNH2
Buprenorphine	1	KCNH2
Lidoflazine	1	KCNH2
Chlorambucil	1	CTSD

## Sheet: MS
Biological process
Term		Genes
Regulation Of Monoatomic Ion Transport	4	KCNJ5;KCNJ10;WWP2;PDZK1
Extracellular Transport	3	DNAAF2;SPAG6;WWP2
Canonical Wnt Signaling Pathway	5	WNT11;SIAH1;WNT7A;LRP6;PPP1CA
Regulation Of DNA-templated Transcription	26	CITED2;SPIN3;GATA1;MEOX1;FOXO1;LRP6;WNT11;KAT5;ZIC2;POLR2A;CREG1;HIVEP1;ZKSCAN2;HES2;HTATIP2;FOXD1;MSX2;NEK4;ARNT;WNT7A;MITF;WWP2;CBFA2T3;GCLC;WT1;REL;ZNF711
Negative Regulation Of Nucleic Acid-Templated Transcription	9	GCLC;FOXD1;WNT11;KAT5;MSX2;ZIC2;CITED2;WT1;WWP2;CBFA2T3;FOXO1
Regulation Of Monoatomic Anion Transport	2	CA2;PDZK1
Positive Regulation Of Nucleic Acid-Templated Transcription	12	WNT11;KAT5;NEK4;ZIC2;CITED2;WT1;WNT7A;MITF;ZNF711;GATA1;FOXO1;LRP6
Glutathione Biosynthetic Process	2	GCLC;CHAC2
Negative Regulation Of DNA-templated Transcription	17	FOXD1;MSX2;CITED2;CBX2;MITF;WWP2;GATA1;CBFA2T3;FOXO1;GCLC;WNT11;KAT5;IFI27;ZIC2;WT1;HIVEP1;FNIP2
Nonribosomal Peptide Biosynthetic Process	2	GCLC;CHAC2
Molecular functions
Term		Genes
Retinal Dehydrogenase Activity (GO:0001758)	2	AKR1B10;AKR1C3
Frizzled Binding (GO:0005109)	3	WNT11;WNT7A;LRP6
alditol:NADP+ 1-Oxidoreductase Activity (GO:0004032)	2	AKR1B10;AKR1C3
C2H2 Zinc Finger Domain Binding (GO:0070742)	2	WT1;GATA1
Aldo-Keto Reductase (NADP) Activity (GO:0004033)	2	AKR1B10;AKR1C3
Phosphatase Activator Activity (GO:0019211)	2	KAT5;CALM1
Protein Serine/Threonine Phosphatase Activity (GO:0004722)	3	PPP1CB;CTDSPL;PPP1CA
Alcohol Dehydrogenase (NADP+) Activity (GO:0008106)	2	AKR1B10;AKR1C3
Oxidoreductase Activity, Acting On The Aldehyde Or Oxo Group Of Donors, NAD Or NADP As Acceptor (GO:0016620)	2	AKR1B10;AKR1C3
mRNA 3'-UTR AU-rich Region Binding (GO:0035925)	2	EXOSC4;ELAVL1
Cellular components
Term		Genes
Vesicle (GO:0031982)	7	OLFML3;LAMP3;SLC6A14;MYO5C;CALM1;MFGE8;CORO1C
Vacuolar Lumen (GO:0005775)	5	ASAH1;GCA;CREG1;CTSD;FTL
Actin Cytoskeleton (GO:0015629)	7	MLPH;KLHL14;TPM1;MYO5C;FAM107A;ALDOA;CORO1C
Secretory Granule Lumen (GO:0034774)	6	SERPINB1;GCA;CREG1;ALDOA;CTSD;FTL
Azurophil Granule Lumen (GO:0035578)	39	GCA;CREG1;FTL
Cytoskeleton (GO:0005856)	9	KLHL14;SPAG6;EPB41L2;TPM1;MYO5C;ITPKA;FAM107A;ALDOA;CORO1C
Tertiary Granule (GO:0070820)	4	ASAH1;STBD1;ALDOA;CTSD
Alveolar Lamellar Body (GO:0097208)	1	LAMP3
Nucleus (GO:0005634)	41	CITED2;FAM107A;GATA1;ELAVL1;MEOX1;TOB1;FOXO1;PPP1CB;EXOSC4;KAT5;ZIC2;POLR2A;HIVEP1;TRIM21;HES2;HTATIP2;MSMB;FOXD1;MSX2;KHNYN;TSC22D1;HSPA1L;SPAG6;CBX2;SIAH1;AKR1C3;ARNT;MITF;NAP1L1;WWP2;CBFA2T3;PPP1CA;MAPK13;ERCC3;WT1;ITPKA;REL;MT1H;ZNF711;CALM1;ALDOA
Ficolin-1-Rich Granule (GO:0101002)	4	ASAH1;STBD1;ALDOA;CTSD
Pathways
Term		Genes
Osteoblast differentiation	5	WNT11;WNT7A;HES2;LRP6;MAPK13
Wnt signaling in kidney disease	3	WNT11;WNT7A;LRP6
ncRNAs involved in Wnt signaling in hepatocellular carcinoma	4	WNT11;WNT7A;ELAVL1;LRP6
Common Pathways Underlying Drug Addiction	3	PPP1CB;CALM1;PPP1CA
Airway smooth muscle cell contraction	2	PPP1CB;CALM1
Nuclear Receptors Meta-Pathway	7	GCLC;ZIC2;SLC6A14;ARNT;MFGE8;FOXO1;FTL
Vitamin D Receptor Pathway	5	SLC37A2;SERPINB1;TPM1;KRT34;FOXO1
Hippo-Merlin Signaling Dysregulation	4	PPP1CB;PRKAR2A;MET;PPP1CA
Photodynamic therapy-induced NFE2L2 (NRF2) survival signaling	2	GCLC;MAPK13
Mammalian disorder of sexual development	2	WT1;CBX2
Diseases
Term		Genes
Mammary Neoplasms	36	CITED2;GDPD5;GATA1;ELAVL1;TOB1;FOXO1;LRP6;GJA1;WNT11;KAT5;LAMP3;CTSD;GALNT6;SERPINB1;IL4R;MSX2;CISH;TSC22D1;TPM1;AKR1C3;ARNT;TBC1D9;WNT7A;PDZK1;CBFA2T3;PPP1CA;POR;AKR1B10;IFI27;THEMIS2;WT1;REL;MT1H;ALDOA;MFGE8;MET
Basal ganglia calcification	4	IFIH1;GJA1;ERCC3;CA2
Neoplasm Metastasis	48	IPO13;CITED2;PLA2G6;GATA1;ELAVL1;TOB1;PCDH17;FOXO1;CORO1C;LRP6;GJA1;RPPH1;WNT11;KAT5;ZIC2;CA2;LAMP3;HIVEP1;CTSD;ADAMTS9;HTATIP2;MSMB;STARD13;IL4R;CISH;CBX2;TPM1;SLC6A14;AKR1C3;ARNT;TBC1D9;MITF;NAP1L1;PDZK1;CBFA2T3;PPP1CA;MAPK13;GCLC;AKR1B10;IFI27;TNNT1;WT1;MT1H;CALM1;ALDOA;MFGE8;MET;FTL
Rheumatoid Arthritis	28	LST1;FAM107A;GDPD5;ELAVL1;FOXO1;LRP6;IFIH1;KAT5;CA2;LAMP3;TRIM21;CTSD;ADAMTS9;IL4R;CISH;HSPA1L;IL10RB;TBC1D9;MITF;MAPK13;GCLC;AKR1B10;IFI27;TRAF5;REL;CALM1;MET;FTL
Malignant neoplasm of prostate	40	ASAH1;PLA2G6;GATA1;ELAVL1;FOXO1;PPP1CB;IFIH1;GJA1;WNT11;KAT5;ZIC2;ZMYM3;POLR2A;PRKAR2A;CREG1;HIVEP1;CTSD;HTATIP2;MSMB;SERPINB1;IL4R;FOXD1;CISH;TSC22D1;CBX2;SIAH1;AKR1C3;ARNT;TBC1D9;NAP1L1;WWP2;PDZK1;OLFM1;GCLC;MLPH;IFI27;ERCC3;WT1;CALM1;MET
Tumor Progression	30	ASAH1;ELAVL1;TOB1;CORO1C;LRP6;GJA1;KAT5;LAMP3;CTSD;HTATIP2;MSMB;IL4R;CISH;HSPA1L;SIAH1;CTDSPL;ARNT;TBC1D9;CABLES1;MITF;NAP1L1;GCLC;AKR1B10;IFI27;WT1;REL;CALM1;MFGE8;MET
Cervix carcinoma	19	IL4R;CISH;TSC22D1;TPM1;SLC6A14;SIAH1;CTDSPL;AKR1C3;WNT7A;FOXO1;GJA1;AKR1B10;WNT11;IFI27;ZIC2;LAMP3;CALM1;MET;MSMB
Tachycardia, Ventricular	4	GJA1;TPM1;CALM1;MET
Breast Carcinoma	44	CITED2;ELAVL1;GJA1;KAT5;CA2;LAMP3;TRIM21;CTSD;HTATIP2;MSMB;IL4R;MSX2;CISH;TPM1;SLC6A14;CTDSPL;ARNT;TBC1D9;PDZK1;CBFA2T3;POR;IFI27;MT1H;ALDOA;MFGE8;MET;FTL;ASAH1;PLA2G6;GDPD5;GATA1;TOB1;FOXO1;CORO1C;LRP6;WNT11;HIVEP1;GALNT6;STARD13;HSPA1L;SPAG6;SIAH1;AKR1C3;CABLES1;NAP1L1;PPP1CA;GCLC;AKR1B10;THEMIS2;ERCC3;WT1;REL;CALM1
Chronic atrial fibrillation	3	KCNJ5;GJA1;CALM1
Drugs
Term		Genes
Mefenamic Acid	2	AKR1B10;AKR1C3
Diclofenac	2	AKR1B10;AKR1C3
Flufenamic Acid	2	AKR1B10;AKR1C3
Quercetin	4	CA2;CALM1;ELAVL1;MET
Mezlocillin	2	CA2;AKR1C3
Hydrochlorothiazide	1	CA2
Hydroxycarbamide	1	CA2
Bendroflumethiazide	1	CA2
Benzthiazide	1	CA2
Chlorambucil	1	CTSD

## Sheet: NR
Biological process
Term		Genes
Positive Regulation Of Nucleic Acid-Templated Transcription	16	KCNH2;SMARCC1;NPM1;NEK4;NR1H2;NME2;ETS1;FOXO1;LRP6;WNT11;ZIC2;WT1;ZNF711;PPARA;SOX4;PPARD
Extracellular Transport	3	DNAAF2;SPAG6;WWP2
Regulation Of Cholesterol Storage	3	NR1H2;PPARA;SREBF2
Positive Regulation Of Transporter Activity	3	PON1;PDZK1;PPARD
Positive Regulation Of DNA-templated Transcription	21	KCNH2;SMARCC1;NPM1;NEK4;NR1H2;NME2;ARNT;ETS1;FOXO1;SREBF2;LRP6;WNT11;ZIC2;WT1;REL;ZNF711;ITGA6;PPARA;SOX4;HTATIP2;PPARD
Positive Regulation Of Cellular Biosynthetic Process	7	NPM1;CCL5;NR1H2;ARNT;ELAVL1;SOX4;FOXO1
Negative Regulation Of Multicellular Organismal Process	8	GJA1;WNT11;TNNT1;NR1H2;ID1;PON1;HMGCR;VASN
Positive Regulation Of Intracellular Signal Transduction	12	GJA1;WNT11;CCL5;TRIM13;REL;CNTN1;AKR1C3;RAPGEF2;LGALS9;ECT2;TRIM21;S100A9
Regulation Of Receptor Signaling Pathway Via JAK-STAT	4	IL10RB;CCL5;CENPJ;CALM1
MAPK Cascade	5	PPP1CB;TAOK3;CCL5;RAPGEF2;LGALS9
Molecular functions
Term		Genes
Retinal Dehydrogenase Activity	2	AKR1B10;AKR1C3
Kinase Inhibitor Activity	3	NPM1;TAOK3;LRP6
alditol:NADP+ 1-Oxidoreductase Activity	2	AKR1B10;AKR1C3
Protein Homodimerization Activity	12	KCNH2;NPM1;FECH;GCA;CCL5;TPM1;PON1;ARNT;ECT2;TRIM21;ELAVL1;LRP6
DNA Binding	14	MSX2;PARP2;TREX1;NR1H2;NME2;ARNT;ETS1;FOXO1;ZIC2;WT1;MSH5;ZNF711;PPARA;PPARD
Aldo-Keto Reductase (NADP) Activity	2	AKR1B10;AKR1C3
DNA-binding Transcription Factor Binding	7	NPM1;IFI27;ARNT;WWP2;PPARA;ETS1;PPARD
Oxidoreductase Activity,	4	AKR1B10;AKR1C3;HMGCR;PTGR1
Transcription Regulatory Region Nucleic Acid Binding	6	KCNH2;SUV39H2;MSX2;WT1;ETS1;SOX4
RNA Polymerase II-specific DNA-binding Transcription Factor Binding	6	NPM1;IFI27;ARNT;WWP2;PPARA;ETS1
Cellular components
Term		Genes
Nucleus	49	SUV39H2;ETS1;ELAVL1;PPP1CB;ZIC2;ENC1;LGALS9;TRIM21;SOX4;HTATIP2;SMARCC1;KHNYN;MSX2;PARP2;RMI1;NME2;ARNT;SREBF2;MSH5;ITPKA;ZNF711;MT1H;DNAJC9;PPARA;ALDOA;S100A9;PPARD;CDCA4;FOXO1;SH3BGRL;EXOSC4;HAUS8;MCMBP;ECT2;NPM1;HSPA1L;SPAG6;CBX2;NR1H2;AKR1C3;DONSON;WWP2;PPP1CA;WT1;ID1;REL;CDK2AP2;ZYX;CALM1
Intracellular Membrane-Bounded Organelle	52	SUV39H2;ETS1;ELAVL1;PPP1CB;GJA1;ZIC2;LAMP3;ENC1;LGALS9;TRIM21;SOX4;HTATIP2;CADPS2;SMARCC1;KHNYN;MSX2;PARP2;RMI1;NME2;ARNT;SREBF2;POR;MSH5;ITPKA;ZNF711;MT1H;DNAJC9;PPARA;ALDOA;S100A9;PPARD;CDCA4;FOXO1;SH3BGRL;EXOSC4;MCMBP;ECT2;ABCA1;NPM1;HSPA1L;SPAG6;CBX2;NR1H2;AKR1C3;DONSON;WWP2;PPP1CA;WT1;ID1;REL;CDK2AP2;ZYX;CALM1
Secretory Granule Lumen	5	GCA;NME2;ALDOA;S100A9;CTSD;FTL
Tight Junction	3	GJA1;RAPGEF2;ECT2
Endoplasmic Reticulum Membrane	11	ABCA1;GJA1;POR;SLC37A2;TREX1;PON1;TRIM13;MGST1;DNAJB14;HMGCR;SREBF2
Alveolar Lamellar Body	1	LAMP3
Box C/D RNP Complex	1	NOP56
PTW/PP1 Phosphatase Complex	1	PPP1CB
Ficolin-1-Rich Granule	4	STBD1;NME2;ALDOA;CTSD
Astrocyte Projection	1	KCNJ10
Pathways
Term		Genes
SREBF and miR33 in cholesterol and lipid homeostasis	4	ABCA1;HMGCR;PPARA;SREBF2
Vitamin D Receptor Pathway	7	SLC37A2;TPM1;ID1;KRT34;LGALS9;S100A9;FOXO1;PPARD
Nuclear Receptors Meta-Pathway	8	PPP1R14C;ZIC2;ENC1;MGST1;ARNT;PTGR1;PPARA;FOXO1;FTL;PPARD
Cholesterol metabolism	4	ABCA1;NR1H2;HMGCR;SREBF2
Eicosanoid metabolism via lipooxygenases	3	PTGR1;PPARA;PPARD
Nuclear Receptors in Lipid Metabolism and Toxicity	3	ABCA1;PPARA;PPARD
Nuclear receptor	3	NR1H2;PPARA;PPARD
Common Pathways Underlying Drug Addiction	3	PPP1CB;CALM1;PPP1CA
Endoplasmic reticulum stress response in coronavirus infection	3	PPP1CB;PPP1R14C;PPP1CA
Energy Metabolism	3	PPARA;FOXO1;PPARD
Diseases
Term		Genes
Squamous cell carcinoma	39	MGST1;ETS1;ELAVL1;LRP6;GJA1;WNT11;ZIC2;CCL5;HEATR3;LGALS9;TRIM21;CTSD;SOX4;HTATIP2;KCNH2;ABCA1;NPM1;CISH;NR1H2;CTDSPL;NME2;AKR1C3;TBC1D9;PDGFRL;SREBF2;PPP1CA;POR;AKR1B10;IFI27;TEP1;WT1;ID1;ITPKA;ZYX;CALM1;PPARA;S100A9;PPARD
Hyperlipoproteinemia Type IIa	10	ABCA1;POR;IL4R;TNNT1;CCL5;TPM1;PON1;TBC1D9;HMGCR;CALM1
Malignant neoplasm of prostate	48	ZFAND5;PON1;HMGCR;ETS1;ELAVL1;FOXO1;PPP1CB;IFIH1;GJA1;WNT11;ZIC2;CCL5;CTSD;SOX4;HTATIP2;KCNH2;ABCA1;SCARA3;NPM1;IL4R;CISH;PARP2;RMI1;CBX2;NR1H2;AKR1C3;KLK13;DONSON;ARNT;TBC1D9;WWP2;PDZK1;SREBF2;IFI27;TEP1;TMSB15A;WT1;MSH5;ID1;TRIM13;CNTN1;CDK2AP2;ZYX;ITGA6;CALM1;PPARA;S100A9;PPARD
Liver carcinoma	51	ETS1;IFIH1;GJA1;ZIC2;LGALS9;TRIM21;CTSD;SOX4;HTATIP2;IL4R;CISH;PARP2;NME2;ARNT;TBC1D9;PDZK1;PTGR1;PDGFRL;SREBF2;IFI27;TEP1;TRIM13;MT1H;ITGA6;PPARA;S100A9;FTL;PPARD;PON1;HMGCR;FOXO1;PCDH17;LRP6;WNT11;CCL5;ECT2;ABCA1;STARD13;NPM1;HSPA1L;IL10RB;NR1H2;VASN;PPP1CA;AKR1B10;WT1;ID1;REL;CDK2AP2;ZYX;CALM1
Neoplasm Metastasis	55	ETS1;ELAVL1;GJA1;RPPH1;ZIC2;LAMP3;LGALS9;CTSD;SOX4;HTATIP2;KCNH2;SMARCC1;SCARA3;IL4R;CISH;TPM1;NME2;ARNT;TBC1D9;PDZK1;IFI27;TNNT1;TMSB15A;ADORA2B;MT1H;ITGA6;PPARA;ALDOA;S100A9;FTL;PPARD;FOXO1;PCDH17;LRP6;WNT11;CCL5;CKB;ECT2;ABCA1;STARD13;NPM1;PPP1R14C;SIVA1;CBX2;TREX1;AKR1C3;KLK13;PPP1CA;AKR1B10;WT1;ID1;CNTN1;ZYX;CALM1
Mammary Neoplasms	39	PON1;ETS1;ELAVL1;FOXO1;LRP6;GJA1;WNT11;LAMP3;CCL5;ENC1;LGALS9;CTSD;SOX4;ABCA1;GALNT6;SCARA3;NPM1;IL4R;MSX2;CISH;TPM1;NME2;AKR1C3;ARNT;TBC1D9;PDZK1;PPP1CA;POR;AKR1B10;IFI27;ADORA2B;WT1;ID1;REL;MT1H;ITGA6;PPARA;ALDOA;PPARD
Colorectal Carcinoma	45	FECH;HMGCR;ETS1;PCDH17;LRP6;IFIH1;GJA1;RPPH1;WNT11;CCL5;ENC1;LGALS9;CKB;ECT2;TRIM21;CTSD;SOX4;HTATIP2;KCNH2;ABCA1;GALNT6;SMARCC1;STARD13;NPM1;IL4R;MSX2;CISH;RMI1;NR1H2;TPM1;NME2;DONSON;ARNT;TBC1D9;AKR1B10;IFI27;ADORA2B;WT1;ID1;TRIM13;CDK2AP2;PPARA;S100A9;PPARD
melanoma	40	CDCA4;ETS1;ELAVL1;FOXO1;IFIH1;GJA1;LAMP3;CCL5;LGALS9;CTSD;SOX4;HTATIP2;KCNH2;ABCA1;STARD13;MSX2;CISH;RMI1;TREX1;NR1H2;TPM1;NME2;ARNT;TBC1D9;WWP2;AKR1B10;IFI27;ADORA2B;WT1;ID1;TRIM13;CDK2AP2;ZYX;CALM1;PPARA;S100A9;SLC25A4;FTL;PPARD
Adenocarcinoma	31	ETS1;ELAVL1;GJA1;WNT11;LAMP3;CCL5;CKB;ECT2;CTSD;SOX4;KCNH2;SMARCC1;GCA;CTDSPL;NME2;AKR1C3;KLK13;TBC1D9;PDGFRL;POR;AKR1B10;IFI27;ADORA2B;WT1;ID1;CNTN1;CDK2AP2;ITGA6;CALM1;S100A9;PPARD
Hypercholesterolemia, Familial	9	ABCA1;POR;IL4R;TNNT1;CCL5;PON1;TBC1D9;HMGCR;SREBF2
Drugs
Term		Genes
Bezafibrate	3	HMGCR;PPARA;PPARD
Rosiglitazone	3	KCNH2;PPARA;PPARD
Stearic Acid	2	PPARA;PPARD
Dodecanoic Acid	2	PPARA;PPARD
Gamolenic Acid	2	PPARA;PPARD
Aprindine	2	KCNH2;CALM1
Caffeine	2	KCNH2;ADORA2B
Eicosapentaenoic Acid	2	PPARA;PPARD
Linolenic Acid	2	PPARA;PPARD
Mefenamic Acid	2	AKR1B10;AKR1C3

## Sheet: NS
Biological process
Term		Genes
Intracellular Lipid Transport	2	CPT1A;TMEM41B
Entrainment Of Circadian Clock By Photoperiod	2	PPP1CB;PPP1CA
Protein Exit From Endoplasmic Reticulum	2	OS9;SEC16A
Photoperiodism	2	PPP1CB;PPP1CA
Carbohydrate Derivative Biosynthetic Process	2	TPI1;RRM2B
Positive Regulation Of Lamellipodium Organization	2	OCLN;CORO1C
Regulation Of G0 To G1 Transition	2	SMARCC1;RRM2B
ATP Metabolic Process	2	ALDOA;NADK
Positive Regulation Of Nucleic Acid-Templated Transcription	6	SMARCC1;NME2;MITF;PPARA;ETS1;FOXO1
Substantia Nigra Development	2	SEC16A;CALM1
Molecular functions
Term		Genes
Insulin-Like Growth Factor I Binding	2	IGFBP2;ITGA6
Protein Serine/Threonine Phosphatase Activity	3	PPP1CB;CTDSPL;PPP1CA
Insulin-Like Growth Factor Binding	2	IGFBP2;ITGA6
Oxidoreductase Activity	2	AKR1B10;ALDH18A1
mRNA 3'-UTR AU-rich Region Binding	2	EXOSC4;ELAVL1
Ferrous Iron Binding	2	FECH;FTL
Oxidoreductase Activity	3	H6PD;AKR1B10;PTGR1
DNA-binding Transcription Activator Activity	5	REL;MITF;PPARA;ETS1;FOXO1
Phosphoric Ester Hydrolase Activity	2	PPP1CB;PPP1CA
Iron Ion Binding	2	FECH;FTL
Cellular components
Term		Genes
Intracellular Organelle Lumen	8	H6PD;FECH;OS9;BGLAP;COL22A1;NME2;ABAT;ALDOA
Supramolecular Fiber	2	MFAP4;CTPS1
Endoplasmic Reticulum Lumen	4	H6PD;OS9;BGLAP;COL22A1
Alveolar Lamellar Body	1	LAMP3
Secretory Granule Lumen	4	CREG1;NME2;ALDOA;FTL
PTW/PP1 Phosphatase Complex	1	PPP1CB
Flotillin Complex	1	CORO1C
Hrd1p Ubiquitin Ligase Complex	1	OS9
Bicellular Tight Junction	2	OCLN;RAPGEF2
Autolysosome	1	FTL
Pathways
Term		Genes
Common Pathways Underlying Drug Addiction	3	PPP1CB;CALM1;PPP1CA
Computational Model of Aerobic Glycolysis	2	TPI1;ALDOA
Biomarkers for pyrimidine metabolism disorders	2	RRM2B;CKB
Melanoma	3	MITF;CALM1;ETS1
Airway smooth muscle cell contraction	2	PPP1CB;CALM1
Cori Cycle	2	TPI1;ALDOA
Nucleotide metabolism	2	RRM2B;NME2
Urea cycle and metabolism of amino groups	2	CKB;ALDH18A1
Pyrimidine metabolism	3	RRM2B;NME2;CTPS1
PPAR-alpha pathway	2	CPT1A;PPARA
Diseases
Term		Genes
Neoplasm Metastasis	29	ETS1;ELAVL1;FOXO1;PCDH17;CORO1C;BGLAP;LAMP3;CKB;SMARCC1;CPT1A;IL4R;TPI1;SIVA1;CBX2;IGFBP2;NME2;KLK13;MITF;PPP1CA;OCLN;AKR1B10;RRM2B;TNNT1;MT1H;ITGA6;ALDOA;PPARA;CALM1;FTL
Mammary Neoplasms	20	CPT1A;IL4R;TPI1;MSX2;IGFBP2;NME2;ETS1;ELAVL1;FOXO1;PPP1CA;OCLN;AKR1B10;RRM2B;THEMIS2;BGLAP;LAMP3;REL;MT1H;ITGA6;ALDOA;PPARA
Breast Carcinoma	38	FECH;ETS1;ELAVL1;FOXO1;CORO1C;BGLAP;LAMP3;CKB;SMARCC1;CPT1A;IL4R;TPI1;MSX2;SIVA1;SPAG6;IGFBP2;CTDSPL;NME2;KLK13;PPP1CA;OCLN;AKR1B10;RRM2B;THEMIS2;REL;MT1H;ITGA6;ALDOA;PPARA;CALM1;FTL
Malignant neoplasm of breast	32	FECH;ETS1;ELAVL1;FOXO1;CORO1C;BGLAP;LAMP3;CKB;SMARCC1;CPT1A;IL4R;TPI1;MSX2;SIVA1;SPAG6;SEC16A;IGFBP2;NME2;KLK13;PPP1CA;OCLN;AKR1B10;RRM2B;THEMIS2;REL;MT1H;ITGA6;ALDOA;PPARA;CALM1;FTL
Anemia, Hemolytic	5	TPI1;H6PD;FECH;ALDOA;PPARA
Degenerative polyarthritis	11	IL4R;TPI1;AKR1B10;MSX2;RRM2B;BGLAP;NME2;ALDOA;PPARA;CALM1;ELAVL1;FTL
Rheumatoid Arthritis	16	IL4R;TPI1;IL10RB;MITF;ETS1;ELAVL1;FOXO1;AKR1B10;OS9;BGLAP;LAMP3;REL;ITGA6;PPARA;CALM1;FTL
Hepatitis C	10	CPT1A;OCLN;TPI1;AKR1B10;IL10RB;LAMP3;TMEM56;CKB;PPARA;FOXO1
Tumor Progression	16	SMARCC1;IL4R;TPI1;IGFBP2;CTDSPL;MITF;ETS1;ELAVL1;CORO1C;OCLN;AKR1B10;RRM2B;LAMP3;REL;CKB;PPARA;CALM1
Adenocarcinoma	15	SMARCC1;TPI1;IGFBP2;CTDSPL;NME2;KLK13;ETS1;ELAVL1;OCLN;AKR1B10;RRM2B;LAMP3;ITGA6;CKB;CALM1
Drugs
Term		Genes
Stearic Acid	1	PPARA
Epalrestat	1	AKR1B10
Dodecanoic Acid	1	PPARA
Gamolenic Acid	1	PPARA
Vemurafenib	1	FECH
Bezafibrate	1	PPARA
Gemfibrozil	1	PPARA
Linolenic Acid	1	PPARA
Aprindine	1	CALM1
Eicosapentaenoic Acid	1	PPARA
