# Supplementary material for: Exploring Potentilla nepalensis Phytoconstituents: Integrated Strategies of Network Pharmacology, Molecular Docking, Dynamic Simulations, and MMGBSA Analysis for Cancer Therapeutic Targets Discovery
Source: Pharmaceuticals (Basel). 2024 Jan 19;17(1):134. doi: 10.3390/ph17010134 (PMC10819299; doi:10.3390/ph17010134)
Supplement: Supplementary file 1 [file pharmaceuticals-17-00134-s001.zip › Excel S2. Protein-Protein interaction network analysis.xlsx]

## Sheet: MR
AverageShortestPathLength	BetweennessCentrality	ClosenessCentrality	ClusteringCoefficient	Degree	name
4	0	0.25	1	2	AHR
3.02817	0.189416	0.330233	0.180952	15	HSPCB
4	0	0.25	1	2	ARNT
3.56338	0.000101	0.280632	0.9	5	AHSA1
3.57746	0	0.279528	1	4	FKBP4
3.52113	0.00668104	0.284	0.6	6	STUB1
3.30986	0.0600077	0.302128	0.333333	9	DNAJB1
3.25352	0.0694053	0.307359	0.52381	7	CDC37
4.23944	0.0820926	0.23588	0	2	AXIN1
3.33803	0.118189	0.299578	0.166667	4	SKP1
5.16901	0.0555332	0.19346	0.333333	3	LRP6
3.16901	0.219678	0.315556	0.52381	7	CDK7
2.94366	0.162617	0.339713	0.4	5	CDK4
2.85915	0.333742	0.349754	0.257143	15	NFKB1
3.53521	0.338028	0.282869	0.52381	7	POLR2C
3.74648	0	0.266917	1	5	POLR2I
3.74648	0	0.266917	1	5	SUPT4H1
3.23944	0.180501	0.308696	0.52381	7	TBP
3.74648	0	0.266917	1	5	POLR2A
4.50704	0	0.221875	0	1	DHX58
3.52113	0.119098	0.284	0.142857	7	IFIH1
6.14085	0	0.162844	1	2	DKK4
6.14085	0	0.162844	1	2	WNT11
4.01408	0	0.249123	0	1	DNAAF2
2.94366	0.238466	0.339713	0.190476	7	SIRT1
4.1831	0	0.239057	1	2	HSPA12A
3.87324	0.00709256	0.258182	0	2	TRIM21
3.70423	0.013535	0.269962	0.4	5	HSPA1L
3.78873	0.0383428	0.263941	0	3	ELAVL1
3.85915	0.0128223	0.259124	0.666667	6	TRAF5
4.77465	0	0.20944	0	1	TRA2A
5.32394	0	0.187831	0	1	ELP3
4.33803	0.028169	0.230519	0	2	IKBKAP
3.8169	0	0.261993	1	2	ETS1
3.3662	0.0356606	0.297071	0.4	6	FOXO1
6.46479	0.0138833	0.154684	0.785714	8	EXOSC4
6.46479	0.0138833	0.154684	0.785714	8	EXOSC5
5.59155	0.0190528	0.178841	0.745455	11	FBL
5.60563	0.0115617	0.178392	0.866667	10	UTP18
5.60563	0.0115617	0.178392	0.866667	10	KRR1
5.60563	0.0115617	0.178392	0.866667	10	RRP9
5.60563	0.0115617	0.178392	0.866667	10	MPHOSPH10
7.43662	0	0.13447	1	2	MPHOSPH6
5.60563	0.0115617	0.178392	0.866667	10	NOP56
4.88732	0.0133932	0.204611	0.8	5	RPL18A
4.80282	0.112821	0.208211	0.636364	11	RPS12
4.80282	0.112821	0.208211	0.636364	11	RPS19
5.64789	0	0.177057	1	8	NAT10
4.35211	0	0.229773	0	1	HOXA11
3.60563	0.00251844	0.277344	0.7	5	MAPK14
3.16901	0.0652635	0.315556	0.333333	9	MAPK8
3.40845	0.0201468	0.293388	0.638889	9	TRAF2
3.35211	0.0322497	0.298319	0.611111	9	RIPK1
4	0	0.25	1	2	KCNH2
4.50704	0	0.221875	0	1	IFI27
3.38028	0.110946	0.295833	0.348485	12	NFKBIA
4.47887	0.028169	0.22327	0	2	PPP1CA
4.66197	0.0142857	0.214502	0.5	4	IL10RA
4.69014	0	0.213213	1	2	IL4R
5.6338	0	0.1775	1	2	IL26
3.73239	0.108048	0.267925	0.333333	4	IL4
4.67606	0.0136821	0.213855	0.666667	3	IL10RB
3.60563	0.028169	0.277344	0.333333	3	KAT5
4.59155	0	0.217791	0	1	YEATS4
4.08451	0.00125387	0.244828	0.933333	6	MAP3K7IP3
3.5493	0.0061084	0.281746	0.75	8	TNFRSF1A
3.59155	0.00525454	0.278431	0.714286	8	TAB1
4.15493	0	0.240678	0	1	MAPK8IP1
3.71831	0	0.268939	1	2	REL
4.14085	0.149095	0.241497	0.7	5	RPL19
4.14085	0.149095	0.241497	0.7	5	RPL35
5.46479	0	0.18299	0	1	PPP1CB

## Sheet: MS
AverageShortestPathLength	BetweennessCentrality	ClosenessCentrality	ClusteringCoefficient	Degree	name
4.08974	0	0.244514	0	1	AHR
3.10256	0.025641	0.322314	0.333333	3	ARNT
2.15385	0.219979	0.464286	0.215686	18	EP300
2.70513	0.00795501	0.369668	0.666667	4	EPAS1
2.61538	0.192739	0.382353	0.428571	8	AXIN1
2.41026	0.0437081	0.414894	0.5	5	SKP1
3.47436	0.0209069	0.287823	0.714286	8	LRP6
3.47436	0.0209069	0.287823	0.714286	8	DKK2
1.87179	0.560058	0.534247	0.15	25	TP53
3.5	0.00472861	0.285714	0.933333	6	WNT1
3.5	0.00472861	0.285714	0.933333	6	WNT3A
3.28205	0	0.304688	1	2	SIAH1
3.47436	0.0209069	0.287823	0.714286	8	LRP5
3.02564	0.00260117	0.330508	0.75	9	BIRC3
2.5641	0.0247162	0.39	0.75	9	TNFRSF1A
3.01282	0.00626655	0.331915	0.6	10	TAB1
2.29487	0.156873	0.435754	0.361905	15	NFKBIA
2.24359	0.137079	0.445714	0.358333	16	NFKB1
3.03846	0.00147498	0.329114	0.892857	8	TRAF2
2.96154	0.00792092	0.337662	0.75	9	RIPK1
3.33333	0.0023643	0.3	0.714286	7	TRAF5
3.16667	0.000452	0.315789	0.952381	7	MAP3K7IP3
2.5	0.00910591	0.4	0.666667	6	REL
2.85897	0	0.349776	0	1	CABLES1
4.03846	0	0.247619	1	3	CBFA2T3
4.03846	0	0.247619	1	3	LMO2
3.07692	0.024975	0.325	0.666667	4	GATA1
3.07692	0.024975	0.325	0.666667	4	TAL1
3.79487	0	0.263514	0	1	CBL
2.80769	0.0509491	0.356164	0	3	MET
2.53846	0.0458584	0.393939	0.824176	14	CDK7
3.19231	0.00861044	0.313253	0.813187	14	POLR2C
3.20513	0.000285	0.312	0.923077	13	POLR2I
3.28205	0	0.304688	1	7	SUPT4H1
2.38462	0.11786	0.419355	0.595588	17	TBP
3.20513	0.000285	0.312	0.923077	13	POLR2J
3.19231	0.00861044	0.313253	0.813187	14	POLR2D
3.21795	0	0.310757	1	12	GTF2E1
3.19231	0.00861044	0.313253	0.813187	14	POLR2A
2.55128	0.0384729	0.39196	0.884615	13	ERCC3
3.21795	0	0.310757	1	12	GTF2H4
3.21795	0	0.310757	1	12	MNAT1
3.21795	0	0.310757	1	12	GTF2H2
2.55128	0.0384729	0.39196	0.884615	13	GTF2H1
2.69231	0.003774	0.371429	0.6	5	CITED2
2.82051	0.025641	0.354545	0.333333	3	WT1
2.52564	0.00292172	0.395939	0.642857	8	FOXO1
3.98718	0	0.250804	0	1	DHX58
3	0.124542	0.333333	0.142857	7	IFIH1
4.38462	0.000416	0.22807	0.761905	7	DKK4
4.42308	0	0.226087	1	4	WNT7A
4.42308	0	0.226087	1	4	WNT11
2.75641	0.00784084	0.362791	0.333333	3	ELAVL1
2.35897	0.0128073	0.423913	0.571429	8	SIRT1
4.24359	0	0.23565	0	1	ELP3
3.25641	0.025641	0.307087	0	2	IKBKAP
2.48718	0.00454067	0.402062	0.714286	7	MAPK14
3.14103	0	0.318367	0	1	NAP1L1
3.14103	0	0.318367	0	1	MITF
2.55128	0.025641	0.39196	0.6	5	KAT5
2.53846	0.0016206	0.393939	0.761905	7	PPARGC1A
3.80769	0	0.262626	0	1	FOXD1
2.74359	0.00245854	0.364486	0.5	4	MAPK13
3.79487	0	0.263514	0	1	HGF
3.82051	0	0.261745	0	1	HSPA12A
2.83333	0.025641	0.352941	0	2	HSPA1L
3.98718	0	0.250804	0	1	IFI27
3.98718	0	0.250804	0	1	TRIM21
3.96154	0.025641	0.252427	0	2	PPP1CA
3.5	0.00888001	0.285714	0.6	5	IL10RA
3.53846	0	0.282609	1	2	IL4R
4.46154	0	0.224138	1	3	IL26
2.57692	0.121878	0.38806	0.333333	6	IL4
3.51282	0.00821401	0.284672	0.833333	4	IL22RA1
3.51282	0.00821401	0.284672	0.833333	4	IL10RB
3.53846	0	0.282609	0	1	YEATS4
3.14103	0	0.318367	1	3	NFKBIE
4.15385	0	0.240741	1	3	WWP2
4.94872	0	0.202073	0	1	PPP1CB

## Sheet: NR
AverageShortestPathLength	BetweennessCentrality	ClosenessCentrality	ClusteringCoefficient	Degree	name
3.98936	0.000892	0.250667	0.7	5	ABCA1
3.98936	0.0212766	0.250667	0.6	5	APOA1
3.98936	0.000892	0.250667	0.7	5	HMGCR
3.12766	0.112769	0.319728	0.277778	9	SREBF2
3.44681	0.032812	0.290123	0.392857	8	PPARA
4.10638	0	0.243523	1	2	NR1H2
3.67021	0.194578	0.272464	0.266667	6	ACTN4
4.62766	0.00509037	0.216092	0.333333	3	ITGB4
4.53191	0.077957	0.220657	0.285714	7	VCL
4.6383	0	0.215596	1	2	ITGA6
4.56383	0.0150423	0.219114	0.6	5	PXN
2.89362	0.208877	0.345588	0.333333	3	WT1
4.57447	0.00486159	0.218605	0.833333	4	ZYX
4.62766	0	0.216092	0	1	AHR
3.6383	0.0212766	0.274854	0.333333	3	ARNT
4.97872	0	0.200855	0	1	PON1
2.68085	0.162756	0.373016	0.285714	15	EP300
3.23404	0.00645924	0.309211	0.666667	3	EPAS1
3.24468	0.0624571	0.308197	0.333333	3	AXIN1
3.05319	0.00687213	0.327526	0.666667	4	SKP1
4.19149	0.0420956	0.238579	0.333333	3	LRP6
2.32979	0.582113	0.429224	0.168421	20	TP53
3.7766	0.00607466	0.264789	0.7	5	CCL17
3.55319	0.0264892	0.281437	0.47619	7	CCL2
2.97872	0.130265	0.335714	0.305556	9	IL4
4.39362	0.000284	0.227603	0.8	5	CCL27
4.45745	5.72e-05	0.224344	0.833333	4	CCL21
3.5	0.0464882	0.285714	0.388889	9	CCL5
2.87234	0.13099	0.348148	0.290909	11	NFKBIA
4.40426	0.000227	0.227053	0.833333	4	CXCL6
2.76596	0.143046	0.361538	0.314286	15	NFKB1
3.79787	0.0121858	0.263305	0.466667	6	IL10RA
3.5	0.12425	0.285714	0.0952381	7	IFIH1
4.48936	0	0.222749	0	1	DHX58
5.17021	0	0.193416	1	2	DKK4
5.17021	0	0.193416	1	2	WNT11
4.26596	0	0.234414	0	1	DNAJB14
3.2766	0.0423244	0.305195	0	3	HSPA1L
4.20213	0	0.237975	0	1	DONSON
3.21277	0.102837	0.311258	0.2	5	RPA1
3.71277	0.0420956	0.269341	0	2	ECT2
4.68085	0.0212766	0.213636	0	2	KIF23
2.76596	0.318554	0.361538	0.142857	7	NPM1
3.29787	0	0.303226	1	2	ELAVL1
2.96809	0.0152714	0.336918	0.535714	8	SIRT1
4.82979	0	0.207048	0	1	ELP3
3.84043	0.0212766	0.260388	0	2	IKBKAP
3.02128	0.0051384	0.330986	0.714286	7	MAPK14
3.64894	0.0212766	0.274052	0	2	SMARCC1
3.05319	0	0.327526	1	4	REL
3.06383	0.0212766	0.326389	0.6	5	ETS1
3.04255	0.000389	0.328671	0.809524	7	FOXO1
3	0.0105573	0.333333	0.642857	8	PPARGC1A
4.05319	0	0.246719	0	1	ID1
4.39362	0.00693968	0.227603	0.844444	10	EXOSC4
4.39362	0.00693968	0.227603	0.844444	10	EXOSC5
3.51064	0.103442	0.284848	0.781818	11	FBL
4.38298	0.000261	0.228155	0.933333	10	UTP18
4.38298	0.000261	0.228155	0.933333	10	KRR1
4.38298	0.000261	0.228155	0.933333	10	RRP9
4.38298	0.000261	0.228155	0.933333	10	MPHOSPH10
5.3617	0	0.186508	1	3	MPHOSPH6
4.38298	0.000261	0.228155	0.933333	10	NOP58
4.39362	0.00693968	0.227603	0.844444	10	EXOSC7
3.51064	0.103442	0.284848	0.781818	11	NOP56
4.15957	0.0107527	0.240409	0.5	4	FANCM
4.17021	0.0104095	0.239796	0.666667	3	MSH4
5.1383	0	0.194617	1	2	MSH5
4.18085	0	0.239186	1	2	RMI1
4.41489	0.0212766	0.226506	0.75	8	NAT10
5.52128	0	0.181118	0	1	GJA1
4.10638	0	0.243523	1	2	MVK
4.26596	0	0.234414	0	1	HSPA12A
4.48936	0	0.222749	0	1	IFI27
4.48936	0	0.222749	0	1	TRIM21
4.44681	0.0423244	0.22488	0	3	PPP1CA
3.94681	0	0.253369	1	2	IL4R
4.76596	0	0.209821	1	3	IL26
3.92553	0.00571788	0.254743	0.833333	4	IL22RA1
3.92553	0.00571788	0.254743	0.833333	4	IL10RB
5.46809	0.000801	0.182879	0.5	4	VASP
5.67021	0	0.17636	0	1	STARD13
3.85106	0	0.259669	1	2	MAP3K7IP3
3.68085	0.00110033	0.271676	0.666667	4	TAB1
5.40426	0	0.185039	0	1	TEP1
3.59574	0.00250287	0.278107	0.666667	3	PPARD
3.75532	0	0.266289	0	1	PARP2
5.43617	0	0.183953	0	1	PPP1R14C
5.43617	0	0.183953	0	1	PPP1CB
5.51064	0	0.181467	1	2	SORBS3
4.11702	0	0.242894	0	1	SCAP
3.31915	0	0.301282	0	1	SLC25A4
4.6383	0	0.215596	0	1	SMARCD3
6.48936	0	0.154098	0	1	TNNT1
5.5	0.0212766	0.181818	0	2	TPM1

## Sheet: NS
AverageShortestPathLength	BetweennessCentrality	ClosenessCentrality	ClusteringCoefficient	Degree	name
2.95161	0.000208	0.338798	0.928571	8	AHSA1
2.98387	0	0.335135	1	7	FKBP4
2.3871	0.00954135	0.418919	0.714286	8	STUB1
2.37097	0.00993155	0.421769	0.733333	10	DNAJB1
2.41935	0.00652508	0.413333	0.892857	8	PPID
2.82258	0.00202797	0.354286	0.777778	9	CDC37
2.27419	0.0772356	0.439716	0.530303	12	HSPA4
2.30645	0.0393002	0.433566	0.512821	13	HSPCB
2.20968	0.117997	0.452555	0.341667	16	HSP90AA1
3.08065	0.000397	0.324607	0.666667	3	AIP
2.96774	0.00988792	0.336957	0.4	5	PPARA
5.41935	0	0.184524	0	1	ALDH18A1
4.43548	0.0322581	0.225455	0	2	CTPS1
3.37097	0	0.296651	1	3	ALDOA
3.37097	0	0.296651	1	3	GAPDHS
3.03226	0.0238158	0.329787	0.4	5	TPI1
2.54839	0.110444	0.392405	0.266667	6	H6PD
2.53226	0.0262052	0.394904	0.714286	7	ARID1A
3.35484	0	0.298077	1	5	SMARCC1
2.35484	0.0247922	0.424658	0.416667	9	CDK4
3.35484	0	0.298077	1	5	SMARCD3
1.72581	0.590039	0.579439	0.176667	25	TP53
2.43548	0.0398114	0.410596	0.5	9	SMARCA4
3.35484	0	0.298077	1	5	SMARCE1
2.45161	0.0322903	0.407895	0.607143	8	SMARCB1
3.19355	0	0.313131	0	1	CALM1
2.66129	0	0.375758	1	2	CCAR2
2.35484	0.0368168	0.424658	0.309091	11	SIRT1
2.1129	0.119397	0.473282	0.27619	15	NFKB1
2.45161	0.0053049	0.407895	0.619048	7	FOXO3
3.95161	0	0.253061	1	2	CLDN1
2.98387	0.0599485	0.335135	0.2	5	TJP1
3.25806	0.00763986	0.306931	0.666667	3	OCLN
3.35484	0	0.298077	1	2	CPT1A
2.51613	0.0311768	0.397436	0.571429	7	PPARGC1A
3.48387	0.0634585	0.287037	0.333333	3	NME2
2.66129	0	0.375758	1	2	ELAVL1
4.48387	0	0.223022	0	1	ELP3
3.5	0.0322581	0.285714	0	2	IKBKAP
2.54839	0.00139256	0.392405	0.666667	4	ETS1
2.3871	0.0753148	0.418919	0.222222	9	RUNX1
2.54839	0.000812	0.392405	0.8	6	FOXO1
3.3871	0	0.295238	1	2	PGD
3.53226	0	0.283105	0	1	NADK
3.04839	0	0.328042	1	3	TOMM70
4.1129	0.000714	0.243137	0.733333	6	IFNL1
3.22581	0.0129737	0.31	0.714286	8	IL10RA
4.14516	0	0.241245	1	5	IL26
3.24194	0.0122598	0.308458	0.809524	7	IL22RA1
3.24194	0.0122598	0.308458	0.809524	7	IL10RB
3.24194	0.0122598	0.308458	0.809524	7	IFNLR1
3.27419	0.0103649	0.305419	0.6	5	IL4R
2.3871	0.193099	0.418919	0.472222	9	IL4
3.24194	0.00157765	0.308458	0.666667	7	IL13
2.54839	0.0709526	0.392405	0.533333	6	NFKBIA
2.46774	0.0326987	0.405229	0.6	5	STAT6
3.01613	0	0.331551	1	4	NFKBIE
3.01613	0	0.331551	1	4	NFKBIB
2.58065	0.00749414	0.3875	0.8	5	REL
2.58065	0.122686	0.3875	0.333333	3	RRM2B
3.51613	0	0.284404	1	2	RRM1
3.96774	0	0.252033	0	1	RAPGEF2
2.96774	0.00163988	0.336957	0.333333	3	SUV39H1
