# Supplementary material for: Exploring Potentilla nepalensis Phytoconstituents: Integrated Strategies of Network Pharmacology, Molecular Docking, Dynamic Simulations, and MMGBSA Analysis for Cancer Therapeutic Targets Discovery
Source: Pharmaceuticals (Basel). 2024 Jan 19;17(1):134. doi: 10.3390/ph17010134 (PMC10819299; doi:10.3390/ph17010134)
Supplement: Supplementary file 1 [file pharmaceuticals-17-00134-s001.zip › Text S1.txt]

MR extract inducing genes 
NADK
ZFAND5
TNPO2
MAST4
MSH5
TREX1
TRA2A
RPS19
PTPRO
MAPK8
SEC16A
NOP56
OS9
TPI1
HSPCB
BRMS1
CKB
KCNH2
PLLP
SLC25A4
ZYX
HOXA11
IL4R
PSAP
NADK
ZFAND5
TNPO2
TPI1
OS9
BRMS1
HSPCB
FAM49A
LAMP3
FECH
AKR1B10
TRAF5
AKR1B10
IFI27
MYO5C
PPP1CA
MFAP4
CTSD
ARNT
CADPS2
CCDC41
FNIP2
GCA
GPT2
ITPKA
KCNJ10
KLHL14
PSD3
SPIN3
STARD13
ZNF711
TPM1
GJA1
SNHG8
IKBKAP
PLSCR4
IFIH1
COG5
DNAAF2
FARP1
CTDSPL
PDZK1
NEK4
HEATR3
TBC1D9
IL4R
CISH
PPP1CB
SAT
POR
LRP6
VASN
HSPA1L
TNNT1
ALDOA
FAM171A1
HSPA12A
LIM2
MAP3K7IP3
NKAIN1
PQLC3
RPPH1
SEMA3G
SLC37A2
STBD1
TMEM2
TRIM21
WNT11
ZIC2
KRT34
GALNT6
REL
EXOSC4
HTATIP2
IL10RB
KHNYN
SERPINB8
MFAP4
TOB1
ELAVL1
CBX2
TRAF5
IFI27
NAP1L1
CTDSPL
MT1H
SERPINB1
PCDH17
REL
CREG1
THEMIS2
ZCCHC24
KAT5
FOXO1
MITF
IL10RB
POR
LST1
CALM1
ABAT
ERMP1
MSX2
TMEM56
POLR2A
SPAG6
PLA2G6
HSPA1L
SAT
WT1
PPP1CA
IKBKAP
ETS1
NME2
MFAP4
TMSB15A
AKR1B10
FTL
PTGR1
FECH
CALM1
PGD
CACNG4
CHRNE
