# Supplementary material for: Exploring Potentilla nepalensis Phytoconstituents: Integrated Strategies of Network Pharmacology, Molecular Docking, Dynamic Simulations, and MMGBSA Analysis for Cancer Therapeutic Targets Discovery
Source: Pharmaceuticals (Basel). 2024 Jan 19;17(1):134. doi: 10.3390/ph17010134 (PMC10819299; doi:10.3390/ph17010134)
Supplement: Supplementary file 1 [file pharmaceuticals-17-00134-s001.zip › Text S2.txt]

MS extract inducing genes 
GATA1
GCLC
FTL
MFAP4
TOB1
ELAVL1
CBX2
TRAF5
IFI27
NAP1L1
CTDSPL
MT1H
SERPINB1
PCDH17
REL
CREG1
THEMIS2
ZCCHC24
KAT5
FOXO1
MITF
IL10RB
POR
LST1
CALM1
ABAT
ERMP1
MSX2
TMEM56
POLR2A
SPAG6
PLA2G6
HSPA1L
SAT
WT1
IFI27
MYO5C
PPP1CA
MFAP4
CTSD
ARNT
CADPS2
CCDC41
FNIP2
GCA
GPT2
ITPKA
KCNJ10
KLHL14
PSD3
SPIN3
STARD13
ZNF711
TPM1
GJA1
SNHG8
IKBKAP
PLSCR4
IFIH1
COG5
DNAAF2
FARP1
CTDSPL
PDZK1
NEK4
HEATR3
TBC1D9
IL4R
CISH
PPP1CB
SAT
POR
LRP6
VASN
HSPA1L
TNNT1
ALDOA
FAM171A1
HSPA12A
LIM2
MAP3K7IP3
NKAIN1
PQLC3
RPPH1
SEMA3G
SLC37A2
STBD1
TMEM2
TRIM21
WNT11
ZIC2
KRT34
GALNT6
REL
EXOSC4
HTATIP2
IL10RB
KHNYN
SERPINB8
ERP27
WWP2
GALR2
MEOX1
MFGE8
WNT7A
SRCRB4D
TMEM121
C6ORF48
SIAH1
SLC41A3
MAPK13
METTL21D
TSC22D1
FAM107A
ASAH1
SAT
AKR1C3
CORO1C
ADAMTS9
HIVEP1
CHAC2
IL4R
CABLES1
NRTN
OLFM1
MSMB
CITED2
HES2
ITPK1
LPPR2
EPB41L2
CBFA2T3
KCNJ5
ERCC3
KCNF1
SLC6A14
FOXD1
KCTD20
PDCD7
PRKAR2A
ZKSCAN2
ZMYM3
MET
OLFML3
CAPN9
GDPD5
MLPH
IPO13
CA2
LAMP3
IFI27
MYO5C
PPP1CA
MFAP4
CTSD
ARNT
CADPS2
CCDC41
FNIP2
GCA
GPT2
ITPKA
KCNJ10
KLHL14
PSD3
SPIN3
STARD13
ZNF711
TPM1
GJA1
SNHG8
IKBKAP
PLSCR4
IFIH1
COG5
DNAAF2
FARP1
CTDSPL
PDZK1
NEK4
HEATR3
TBC1D9
IL4R
CISH
PPP1CB
SAT
POR
LRP6
VASN
HSPA1L
TNNT1
ALDOA
FAM171A1
HSPA12A
LIM2
MAP3K7IP3
NKAIN1
PQLC3
RPPH1
SEMA3G
SLC37A2
STBD1
TMEM2
TRIM21
WNT11
ZIC2
KRT34
GALNT6
REL
EXOSC4
HTATIP2
IL10RB
KHNYN
SERPINB8
AKR1B10
LAMP3
AKR1B10
