# Supplementary material for: Exploring Potentilla nepalensis Phytoconstituents: Integrated Strategies of Network Pharmacology, Molecular Docking, Dynamic Simulations, and MMGBSA Analysis for Cancer Therapeutic Targets Discovery
Source: Pharmaceuticals (Basel). 2024 Jan 19;17(1):134. doi: 10.3390/ph17010134 (PMC10819299; doi:10.3390/ph17010134)
Supplement: Supplementary file 1 [file pharmaceuticals-17-00134-s001.zip › Text S3.txt]

NR extract inducing genes 
SREBF2
ARNT
CADPS2
CCDC41
FNIP2
GCA
GPT2
ITPKA
KCNJ10
KLHL14
PSD3
SPIN3
STARD13
ZNF711
GJA1
SNHG8
HEATR3
MYO5C
CTSD
WWP2
SIVA1
PDZK1
CDK2AP2
WDR67
TEP1
TAOK3
PDGFRL
IFIH1
FAM171A1
HSPA12A
LIM2
MAP3K7IP3
NKAIN1
PQLC3
RPPH1
SEMA3G
SLC37A2
STBD1
TMEM2
TRIM21
WNT11
ZIC2
SAT
ENC1
RNFT2
GALNT6
VASN
PPP1R14C
KHNYN
IL4R
SERPINB8
MGST1
ECT2
AKR1C3
CCL5
ABCA1
PON1
HMGCR
S100A9
PPARD
NR1H2
PPARA
ALDOA
PPP1CA
ETS1
CTDSPL
NME2
IKBKAP
SMARCC1
MFAP4
ELAVL1
MT1H
CBX2
ZFAND5
LAMP3
AKR1B10
FAM49A
ALDOA
EXOSC4
FTL
FOXO1
FECH
PTGR1
CALM1
ABAT
ERMP1
MSX2
RAPGEF2
IL10RB
TMEM56
PPP1CB
TNNT1
CKB
PCDH17
ITGA6
SPAG6
COL22A1
KLK13
REL
IL4R
PPP1CA
ETS1
CTDSPL
NME2
IKBKAP
SMARCC1
MFAP4
ELAVL1
MT1H
CBX2
ZFAND5
LAMP3
AKR1B10
FAM49A
ALDOA
EXOSC4
FTL
FOXO1
FECH
PTGR1
CALM1
ABAT
ERMP1
MSX2
RAPGEF2
IL10RB
TMEM56
PPP1CB
TNNT1
CKB
PCDH17
ITGA6
SPAG6
COL22A1
KLK13
REL
IL4R
PPP1CA
ETS1
CTDSPL
NME2
IKBKAP
SMARCC1
MFAP4
ELAVL1
MT1H
CBX2
ZFAND5
LAMP3
AKR1B10
FAM49A
ALDOA
EXOSC4
FTL
FOXO1
FECH
PTGR1
CALM1
ABAT
ERMP1
MSX2
RAPGEF2
IL10RB
TMEM56
PPP1CB
TNNT1
CKB
PCDH17
ITGA6
SPAG6
COL22A1
KLK13
REL
IL4R
IFI27
MYO5C
PPP1CA
MFAP4
CTSD
ARNT
CADPS2
CCDC41
FNIP2
GCA
GPT2
ITPKA
KCNJ10
KLHL14
PSD3
SPIN3
STARD13
ZNF711
TPM1
GJA1
SNHG8
IKBKAP
PLSCR4
IFIH1
COG5
DNAAF2
FARP1
CTDSPL
PDZK1
NEK4
HEATR3
TBC1D9
IL4R
CISH
PPP1CB
SAT
POR
LRP6
VASN
HSPA1L
TNNT1
ALDOA
FAM171A1
HSPA12A
LIM2
MAP3K7IP3
NKAIN1
PQLC3
RPPH1
SEMA3G
SLC37A2
STBD1
TMEM2
TRIM21
WNT11
ZIC2
KRT34
GALNT6
REL
EXOSC4
HTATIP2
IL10RB
KHNYN
SERPINB8
SOX4
NPM1
TMSB15A
TPM1
MAST4
MSH5
TREX1
ADORA2B
CDCA4
CENPJ
DNAJC9
DONSON
HAUS8
MCMBP
NUP155
PARP2
RMI1
SCARA3
SLC16A14
SUV39H2
CBX2
NOP56
TMEM194A
CNTN1
ID1
PPP1CB
CACNG4
CHRNE
WT1
DNAJB14
KCNH2
PLLP
SLC25A4
ZYX
PFKFB2
SH3BGRL
TRIM13
TMEM56
LGALS9
