# Supplementary material for: Exploring Potentilla nepalensis Phytoconstituents: Integrated Strategies of Network Pharmacology, Molecular Docking, Dynamic Simulations, and MMGBSA Analysis for Cancer Therapeutic Targets Discovery
Source: Pharmaceuticals (Basel). 2024 Jan 19;17(1):134. doi: 10.3390/ph17010134 (PMC10819299; doi:10.3390/ph17010134)
Supplement: Supplementary file 1 [file pharmaceuticals-17-00134-s001.zip › Text S4.txt]

NS extract inducing genes 
BGLAP
CEP72
LAMP3
FECH
AKR1B10
PPP1CA
ETS1
CTDSPL
NME2
IKBKAP
SMARCC1
MFAP4
ELAVL1
MT1H
CBX2
ZFAND5
LAMP3
AKR1B10
FAM49A
ALDOA
EXOSC4
FTL
FOXO1
FECH
PTGR1
CALM1
ABAT
ERMP1
MSX2
RAPGEF2
IL10RB
TMEM56
PPP1CB
TNNT1
CKB
PCDH17
ITGA6
SPAG6
COL22A1
KLK13
REL
IL4R
CBX2
ZFAND5
SMARCC1
CTPS1
ELAVL1
MFAP4
TNPO2
SEC16A
FOXO1
FAM49A
REL
PCDH17
TMEM56
ABAT
ERMP1
MSX2
CREG1
THEMIS2
ZCCHC24
CKB
MITF
IGFBP2
OCLN
IL10RB
PTGR1
CPT1A
SPAG6
CALM1
PPARA
TPI1
RRM2B
LINC00467
CORO1C
OS9
ALDH18A1
H6PD
NADK
SIVA1
C10ORF118
OS9
TMEM41B
HSPCB
PPP1CA
ETS1
CTDSPL
NME2
IKBKAP
SMARCC1
MFAP4
ELAVL1
MT1H
CBX2
ZFAND5
LAMP3
AKR1B10
FAM49A
ALDOA
EXOSC4
FTL
FOXO1
FECH
PTGR1
CALM1
ABAT
ERMP1
MSX2
RAPGEF2
IL10RB
TMEM56
PPP1CB
TNNT1
CKB
PCDH17
ITGA6
SPAG6
COL22A1
KLK13
REL
IL4R
